# Supplementary material for: Goal-directed vocal planning in a songbird
Source: eLife. 2024 Jul 3;12:RP90445. doi: 10.7554/eLife.90445 (PMC11221833; doi:10.7554/eLife.90445)
Supplement: Supplementary file 1. [file elife-90445-supp1.xlsx]

## Sheet: Sheet1
Bootstrapped pitch differences between reinforced and deaf control birds. The reported p values correspond to the null hypothesis that release from reinforcement causes no pitch change (bootstrapped, see methods). Two separate analysis windows are considered: 1) the last 2 h of reinforced song on the evening before, and 2) a time-of-day matched 2-h window on the morning before (discounting for ci…	No practice (early)				5 days practice (late)
Reference	last 2 h of reinforcement		2 h time-of-day aligned		last 2 h of reinforcement		2 h time-of-day aligned
time
	d’	p	d’	p	d’	p	d’	p
WN deaf	-0.6 ±0.3	0.007	-0.47 ±0.3	0.03	-1.3 ±0.2	p<10-4	-1.1 ±0.2	p<10-4
Deaf LO	-0.09 ±0.13	0.25	0.34 ±0.07	p>0.99	-0.17 ±0.13	0.10	0.35 ±0.11	p>0.99
Bootstrapped pitch differences between reinforced and deaf control birds.
The reported p values correspond to the null hypothesis that release from reinforcement causes no pitch change (bootstrapped, see methods).
Two separate analysis windows are considered: 1) the last 2 h of reinforced song on the evening before, and 2) a time-of-day matched 2-h window on the morning before (discounting for circadian trends).
WNd birds changed pitch towards baseline, but dLO birds did not.
